**Trace element and isotope geochemistry of Tschicoma Formation intermediate composition dome complexes, Jemez Mountains volcanic field, New Mexico, USA**

Clara M. Waelkens, John Stix, Fraser Goff & Dominique Weis

**Supplementary table:** Overview of ages of the Tschicoma lava dome and lava flow complexes and locations where they are preserved.

| <b>Lava dome complex</b> | <b>Location</b>                | <b>Age</b>                                                                                                                           |
|--------------------------|--------------------------------|--------------------------------------------------------------------------------------------------------------------------------------|
| Tschicoma Peak area      | North and northeast of caldera | $2.62 \pm 0.64$ Ma – $5.34 \pm 0.36$ Ma<br>(Kempter <i>et al.</i> , 2007)                                                            |
| Caballo Mountain         | Sierra de los Valles           | $3.06 \pm 0.15$ Ma – $4.66 \pm 0.17$ Ma<br>(Broxton <i>et al.</i> , 2007)                                                            |
| Cerro Rubio              | Toledo embayment               | $3.56 \pm 0.36$ Ma – $3.59 \pm 0.36$ Ma<br>(K-Ar ages)<br>(Heiken <i>et al.</i> , 1986; Stix <i>et al.</i> , 1988)                   |
| Upper Quemazon           | Eastern caldera rim            | $2.92 \pm 0.03$ Ma<br>(Kelley <i>et al.</i> , 2013)                                                                                  |
| Cañada Bonita            | Eastern caldera rim            | $3.50 \pm 0.23$ Ma<br>(Kelley <i>et al.</i> , 2013; Goff <i>et al.</i> , 2021)                                                       |
| Rendija Canyon           | Sierra de los Valles           | $5.038 \pm 0.003$ Ma – $5.062 \pm 0.006$ Ma<br>(Goff <i>et al.</i> , 2021)                                                           |
| Pajarito Mountain        | Sierra de los Valles           | $2.93 \pm 0.06$ Ma – $3.09 \pm 0.08$ Ma<br>(Broxton <i>et al.</i> , 2007)                                                            |
| Cerro Grande             | Sierra de los Valles           | $2.88 \pm 0.02$ Ma – $3.35 \pm 0.17$ Ma<br>(Broxton <i>et al.</i> , 2007)                                                            |
| Sawyer Dome              | Sierra de los Valles           | $3.18 \pm 0.20$ Ma – $3.67 \pm 0.29$ Ma<br>(Goff <i>et al.</i> , 2006; Broxton <i>et al.</i> , 2007;<br>Kelley <i>et al.</i> , 2013) |
| Redondo Peak megabreccia | Redondo Peak resurgent dome    | $2.01 \pm 0.02$ Ma – $2.20 \pm 0.05$ Ma<br>(Kelley <i>et al.</i> , 2013)                                                             |
